# Supplementary material for: Evidence and Modification of Non-Visual Eyestalk Organs in Troglobiont Mysida and Stygiomysida (Crustacea)
Source: MDPI journal article supplement (doi:10.3390/arthropoda1040019), 2023-11-14
Supplement: s1 [file s1]

**Table S1.** Sampling data, troglophilia (TR) and measurements related to body length (BL), eye length (EL) and length of the Organ of Bellonci (OBL) in Mysida and Stygiomysida.

| Species                                                   | TR<br>troglophilia | Locality                                                   | Latitude<br>(DD) | Longitude<br>(DD) | Habitat             | Depth<br>(m) | Salinity<br>(psu) | Stage | BL<br>(mm) | EL<br>(mm) | OBL<br>(µm) |
|-----------------------------------------------------------|--------------------|------------------------------------------------------------|------------------|-------------------|---------------------|--------------|-------------------|-------|------------|------------|-------------|
| Order MYSIDA                                              |                    |                                                            |                  |                   |                     |              |                   |       |            |            |             |
| <i>Antromysis cenotensis</i><br>Creaser, 1936             | troglobiont        | Yucatán, Grutas de Tzab-Nah                                | 20.7311          | −89.4737          | anchihaline<br>cave |              |                   | F ad. | 2.9        | 0.28       | 89          |
|                                                           |                    |                                                            |                  |                   |                     |              |                   | F ad. | 3.0        | 0.18       | 80          |
|                                                           |                    |                                                            |                  |                   |                     |              |                   | M ad. | 2.8        | 0.15       | 62          |
|                                                           |                    |                                                            |                  |                   |                     |              |                   | M ad. | 3.0        | 0.22       | 71          |
|                                                           |                    |                                                            |                  |                   |                     |              |                   | M ad. | 3.0        | 0.18       | 89          |
| <i>Antromysis cubanica</i><br>Băcescu et Orghidan, 1971   | troglobiont        | Cuba, Cueva Juanelo Piedra                                 | 22.73            | −82.407           | anchihaline<br>cave |              |                   | F ad. | 3.5        | 0.28       | 95          |
|                                                           |                    |                                                            |                  |                   |                     |              |                   | F ad. | 3.3        | 0.34       | 76          |
|                                                           |                    |                                                            |                  |                   |                     |              |                   | F ad. | 4.1        | 0.40       | 87          |
|                                                           |                    |                                                            |                  |                   |                     |              |                   | M ad. | 3.0        | 0.23       | 82          |
| <i>Antromysis peckorum</i><br>Bowman, 1977                | troglobiont        | Jamaica, Jackson's Bay Cave                                | 17.7352          | −77.2233          | anchihaline<br>cave |              | brackish          | F ad. | 2.4        | 0.16       | 65          |
|                                                           |                    |                                                            |                  |                   |                     |              |                   | F ad. | 2.7        | 0.19       | 76          |
|                                                           |                    |                                                            |                  |                   |                     |              |                   | F ad. | 2.8        | 0.21       | 105         |
|                                                           |                    |                                                            |                  |                   |                     |              |                   | F ad. | 2.8        | 0.17       | 56          |
|                                                           |                    |                                                            |                  |                   |                     |              |                   | F ad. | 2.9        | 0.18       | 62          |
| <i>Heteromysis cotti</i><br>Calman, 1932                  | troglobiont        | Lanzarote, Jameos del Agua                                 | 29.1605          | −13.4393          | lava tunnel         |              |                   | F ad. | 4.9        | 0.35       | 80          |
|                                                           |                    |                                                            |                  |                   |                     |              |                   | F ad. | 5.4        | 0.36       | 71          |
|                                                           |                    |                                                            |                  |                   |                     |              |                   | M ad. | 5.0        | 0.40       | 71          |
|                                                           |                    |                                                            |                  |                   |                     |              |                   | M ad. | 6.1        | 0.46       | 89          |
|                                                           |                    |                                                            |                  |                   |                     |              |                   | M ad. | 6.1        | 0.47       | 107         |
| <i>Troglomysis vjetrenicensis</i><br>Stammer, 1933        | troglobiont        | Bosnia-Herzegovina, Vjetrenica<br>Cave                     | 42.85            | 17.98             | freshwater<br>cave  | 0–1          | <1                | F ad. | 11.9       | 0.65       | 96          |
|                                                           |                    |                                                            |                  |                   |                     |              |                   | F ad. | 13.1       | 0.70       | 80          |
|                                                           |                    |                                                            |                  |                   |                     |              |                   | M ad. | 9.9        | 0.56       | 82          |
|                                                           |                    |                                                            |                  |                   |                     |              |                   | M ad. | 11.4       | 0.68       | 114         |
|                                                           |                    |                                                            |                  |                   |                     |              |                   | M ad. | 12.5       | 0.62       | 90          |
| <i>Bermudamysis speluncola</i><br>Băcescu et Iliffe, 1986 | troglophile        | Bermuda, Deep Blue Cave, silty<br>sediments and rock walls | 32.3484          | −64.7115          | marine cave         | 6–15         | 35                | M ad. | 3.1        | 0.28       | 53          |

|                                                             |             |                                                                       |         |           |                              |         |          |       |     |      |    |
|-------------------------------------------------------------|-------------|-----------------------------------------------------------------------|---------|-----------|------------------------------|---------|----------|-------|-----|------|----|
|                                                             |             | Bermuda, Grenadier Pool, in water column                              | 32.3526 | −64.7191  | open pool and cavern         | 3–6     | 28       | F ad. | 2.8 | 0.28 | 44 |
|                                                             |             |                                                                       |         |           |                              |         |          | F ad. | 2.9 | 0.26 | 44 |
|                                                             |             |                                                                       |         |           |                              |         |          | F ad. | 3.2 | 0.28 | 71 |
|                                                             |             |                                                                       |         |           |                              |         |          | M ad. | 2.8 | 0.29 | 53 |
| <i>Diamysis camassai</i><br>Ariani et Wittmann, 2002        | troglophile | Gulf of Taranto, Spunnulate dolinas                                   | 40.2890 | 17.8233   | anchihaline dolinas          | 0.2–1.5 | 8        | F ad. | 6.3 | 0.44 | 95 |
|                                                             |             |                                                                       |         |           |                              |         |          | F ad. | 6.4 | 0.44 | 62 |
|                                                             |             |                                                                       |         |           |                              |         |          | F ad. | 6.8 | 0.50 | 71 |
|                                                             |             |                                                                       |         |           |                              |         |          | M ad. | 5.7 | 0.44 | 71 |
|                                                             |             |                                                                       |         |           |                              |         |          | M ad. | 5.9 | 0.50 | 86 |
| <i>Harmelinella mariannae</i><br>Ledoyer, 1989              | troglophile | Cape Verde Islands, Santiago Island, on sandy bottom of cave, night   | 15.2781 | −23.7606  | sublittoral marine cave      | 15      | 35       | M ad. | 2.6 | 0.32 | 44 |
| <i>Hemimysis maderensis</i><br>Ledoyer, 1989                | troglophile | Coast of Madeira, over sand inside cave, night                        | 32.6409 | −16.8310  | large intertidal marine cave | 6–10    | 35       | F ad. | 3.3 | 0.44 | 62 |
|                                                             |             |                                                                       |         |           |                              |         |          | F ad. | 4.4 | 0.49 | 80 |
|                                                             |             |                                                                       |         |           |                              |         |          | F ad. | 5.3 | 0.61 | 62 |
|                                                             |             |                                                                       |         |           |                              |         |          | M ad. | 4.0 | 0.44 | 53 |
|                                                             |             |                                                                       |         |           |                              |         |          | M ad. | 5.1 | 0.39 | 80 |
| <i>Hemimysis margalefi</i><br>Alcaraz, Riera et Gili, 1986  | troglophile | Gulf of Naples, Grotta del Mago, in water column inside cave          | 40.7117 | 13.9641   | intertidal marine cave       | 1–1.5   | 37       | F ad. | 4.5 | 0.33 | 44 |
|                                                             |             |                                                                       |         |           |                              |         |          | F ad. | 4.9 | 0.33 | 45 |
|                                                             |             |                                                                       |         |           |                              |         |          | F ad. | 5.1 | 0.41 | 62 |
|                                                             |             |                                                                       |         |           |                              |         |          | M ad. | 4.2 | 0.31 | 53 |
|                                                             |             |                                                                       |         |           |                              |         |          | M ad. | 4.3 | 0.33 | 44 |
| <i>Hemimysis mediterranea</i><br>Băcesco, 1937              | troglophile | Menorca, coast of Pont d'En Gil, stalactite cave, mysids hyperbenthic | 40.0103 | 3.7944    | large intertidal marine cave | 2–5     | 35       | F ad. | 4.8 | 0.42 | 44 |
|                                                             |             |                                                                       |         |           |                              |         |          | M ad. | 3.7 | 0.42 | 27 |
|                                                             |             |                                                                       |         |           |                              |         |          | M ad. | 4.1 | 0.39 | 44 |
|                                                             |             |                                                                       |         |           |                              |         |          | M ad. | 4.9 | 0.53 | 53 |
|                                                             |             |                                                                       |         |           |                              |         |          | M ad. | 5.1 | 0.49 | 44 |
| <i>Hemimysis speluncola</i><br>Ledoyer, 1963                | troglophile | N-Adriatic, Istria, Banjole Cave                                      | 45.0740 | 13.6105   | intertidal marine cave       | 7       | 37       | F ad. | 5.7 | 0.41 | 53 |
|                                                             |             |                                                                       |         |           |                              |         |          | F ad. | 6.0 | 0.53 | 44 |
|                                                             |             |                                                                       |         |           |                              |         |          | M ad. | 5.2 | 0.41 | 89 |
|                                                             |             |                                                                       |         |           |                              |         |          | M ad. | 5.7 | 0.44 | 71 |
|                                                             |             |                                                                       |         |           |                              |         |          | M ad. | 5.7 | 0.48 | 44 |
| <i>Heteromysis ekamako</i><br>Wittmann et Chevaldonné, 2016 | troglophile | French Polynesia, Ekamako Cave, 10–30 m from cave entrance            | −8.9369 | −140.0908 | marine cave                  | 8–10    | euhaline | M ad. | 3.5 | 0.26 | 63 |
|                                                             |             |                                                                       |         |           |                              |         |          | M ad. | 3.7 | 0.33 | 54 |
|                                                             |             |                                                                       |         |           |                              |         |          | M ad. | 3.7 | 0.36 | 37 |
|                                                             |             |                                                                       |         |           |                              |         |          | F ad. | 3.9 | 0.31 | 37 |
|                                                             |             |                                                                       |         |           |                              |         |          | F ad. | 4.2 | 0.33 | 46 |

|                                                      |             |                                                                               |          |          |                        |       |          |        |      |      |     |
|------------------------------------------------------|-------------|-------------------------------------------------------------------------------|----------|----------|------------------------|-------|----------|--------|------|------|-----|
| <i>Mysidetes hansenii</i><br>Zimmer, 1914            | troglophile | Antarctic, Adélie Land, Damiers Isl.                                          | −66.6535 | 139.9602 | marine ice cave        | 2     | euhaline | F ad.  | 20.0 | 1.11 | 89  |
|                                                      |             |                                                                               |          |          |                        |       |          | F ad.  | 20.3 | 1.11 | 116 |
|                                                      |             |                                                                               |          |          |                        |       |          | F ad.  | 20.9 | 1.22 | 80  |
|                                                      |             |                                                                               |          |          |                        |       |          | F ad.  | 21.0 | 1.11 | 107 |
|                                                      |             |                                                                               |          |          |                        |       |          | F ad.  | 23.1 | 1.33 | 98  |
| <i>Mysidetes illigi</i><br>Zimmer, 1914              | troglophile | Antarctic, Adélie Land, Claude Bernard Isl.                                   | −66.6607 | 140.0258 | marine ice cave        | 6     | euhaline | F sub. | 12.7 | 0.91 | 102 |
|                                                      |             |                                                                               |          |          |                        |       |          | F ad.  | 14.5 | 1.11 | 116 |
|                                                      |             |                                                                               |          |          |                        |       |          | M ad.  | 15.3 | 1.09 | 89  |
|                                                      |             |                                                                               |          |          |                        |       |          | M ad.  | 17.1 | 1.18 | 120 |
|                                                      |             |                                                                               |          |          |                        |       |          | M ad.  | 18.7 | 1.27 | 133 |
| <i>Palaumysis simonae</i><br>Băcescu et Iliffe, 1986 | troglophile | Micronesia, Palau Island, unnamed island near Ngeruktabel Island, Ishura Cave | 7.2435   | 134.3678 | marine cave            | 7.5–2 | 36       | F ad.  | 1.4  | 0.12 | 25  |
|                                                      |             |                                                                               |          |          |                        |       |          | F ad.  | 1.6  | 0.16 | 27  |
|                                                      |             |                                                                               |          |          |                        |       |          | F ad.  | 1.6  | 0.16 | 22  |
|                                                      |             |                                                                               |          |          |                        |       |          | M ad.  | 1.2  | 0.15 | 22  |
|                                                      |             |                                                                               |          |          |                        |       |          | M ad.  | 1.3  | 0.15 | 27  |
| <i>Platyops sterreri</i><br>Băcescu et Iliffe, 1986  | troglophile | Bermuda, Castle Harbor Sound, on sea floor, night                             | 32.3442  | −64.7032 | marine sublittoral     | 10.7  | 35       | F ad.  | 1.8  | 0.13 | 36  |
|                                                      |             | <i>idem</i>                                                                   | 32.3419  | −64.6994 | <i>idem</i>            | 13–14 | 36       | M ad.  | 1.6  | 0.10 | 25  |
|                                                      |             | Guadeloupe, Pointe de la Fontaine, Cathedral Cave                             | 16.463   | −61.533  | marine cave            | 18    | euhaline | M ad.  | 2.0  | 0.12 | 36  |
| <i>Pyroleptomysis peresi</i><br>(Băcescu, 1966)      | troglophile | N-Adriatic Sea, Istria, Banjole Cave                                          | 45.0740  | 13.6105  | intertidal marine cave | 1     | 35       | F ad.  | 4.9  | 0.44 | 53  |
|                                                      |             |                                                                               |          |          |                        |       |          | M ad.  | 3.8  | 0.39 | 35  |
|                                                      |             |                                                                               |          |          |                        |       |          | M ad.  | 5.3  | 0.53 | 62  |
|                                                      |             |                                                                               |          |          |                        |       |          | M ad.  | 5.3  | 0.58 | 53  |
|                                                      |             |                                                                               |          |          |                        |       |          | M ad.  | 5.4  | 0.50 | 44  |
| <i>Siriella gracilipes</i><br>H. Nouvel, 1942        | troglophile | N-Adriatic Sea, Istria, Banjole Cave                                          | 45.0740  | 13.6105  | intertidal marine cave | 1     | 37       | F ad.  | 10.0 | 0.72 | 89  |
|                                                      |             |                                                                               |          |          |                        |       |          | F ad.  | 10.1 | 0.89 | 71  |
|                                                      |             |                                                                               |          |          |                        |       |          | F ad.  | 10.2 | 0.78 | 62  |
|                                                      |             |                                                                               |          |          |                        |       |          | M ad.  | 8.7  | 0.67 | 80  |
|                                                      |             |                                                                               |          |          |                        |       |          | M ad.  | 9.7  | 0.69 | 71  |
| <i>Anisomysis bifurcata</i><br>W.M. Tattersall, 1912 | trogloxene  | Red Sea, Sinai, Naama, reef within sheltered bay                              | 27.9145  | 34.3520  | recesses at reef flat  | 1     | 42       | F ad.  | 3.3  | 0.39 | 53  |
|                                                      |             |                                                                               |          |          |                        |       |          | M ad.  | 3.4  | 0.28 | 62  |
|                                                      |             |                                                                               |          |          |                        |       |          | M ad.  | 3.4  | 0.39 | 53  |
|                                                      |             |                                                                               |          |          |                        |       |          | M ad.  | 3.4  | 0.40 | 80  |
|                                                      |             |                                                                               |          |          |                        |       |          | M ad.  | 3.8  | 0.36 | 62  |

|                                                         |            |                                                                                               |         |         |                                   |         |      |       |     |      |    |
|---------------------------------------------------------|------------|-----------------------------------------------------------------------------------------------|---------|---------|-----------------------------------|---------|------|-------|-----|------|----|
| <i>Anisomysis gutzui</i><br>Băcescu, 1992               | trogloxene | Java Sea, Palau Pari                                                                          | −5.856  | 106.585 |                                   | 1       | 35   | F ad. | 3.0 | 0.36 | 36 |
|                                                         |            |                                                                                               |         |         |                                   |         |      | M ad. | 3.3 | 0.33 | 53 |
| <i>Anisomysis ijimai</i><br>Nakazawa, 1910              | trogloxene | Japan, Suruga Bay, Heda                                                                       | 34.972  | 138.775 | marine surface<br>plankton        | 0       | 35   | F ad. | 5.6 | 0.51 | 89 |
|                                                         |            |                                                                                               |         |         |                                   |         |      | F ad. | 6.4 | 0.53 | 71 |
|                                                         |            |                                                                                               |         |         |                                   |         |      | F ad. | 6.5 | 0.53 | 80 |
|                                                         |            |                                                                                               |         |         |                                   |         |      | F ad. | 6.8 | 0.64 | 80 |
|                                                         |            |                                                                                               |         |         |                                   |         |      | M ad. | 5.7 | 0.64 | 53 |
| <i>Anisomysis marisrubri</i><br>Băcescu, 1973           | trogloxene | Red Sea, Gulf of Aqaba, Dahab,<br>reef edge                                                   | 28.50   | 34.522  | fossil reef                       | 0.2–3   | 42   | F ad. | 5.2 | 0.66 | 53 |
|                                                         |            |                                                                                               |         |         |                                   |         |      | F ad. | 5.5 | 0.56 | 44 |
|                                                         |            |                                                                                               |         |         |                                   |         |      | F ad. | 6.3 | 0.58 | 44 |
|                                                         |            |                                                                                               |         |         |                                   |         |      | M ad. | 4.6 | 0.44 | 44 |
|                                                         |            |                                                                                               |         |         |                                   |         |      | M ad. | 5.0 | 0.52 | 36 |
| <i>Diamysis bahirensis</i><br>(G.O. Sars, 1877)         | trogloxene | Sicily, Lo Stagnone di Marsala,<br><i>Zostera</i>                                             | 37.8738 | 12.4858 | brackish<br>lagoon                | 0.1–0.3 | 40   | F ad. | 4.4 | 0.31 | 44 |
|                                                         |            |                                                                                               |         |         |                                   |         |      | F ad. | 5.0 | 0.32 | 44 |
|                                                         |            |                                                                                               |         |         |                                   |         |      | F ad. | 5.2 | 0.36 | 53 |
|                                                         |            |                                                                                               |         |         |                                   |         |      | M ad. | 3.7 | 0.37 | 36 |
|                                                         |            |                                                                                               |         |         |                                   |         |      | M ad. | 4.6 | 0.32 | 36 |
| <i>Diamysis fluviatilis</i><br>Wittmann et Ariani, 2012 | trogloxene | Italy, Po Valley, Sile River, mysids<br>among macrophytes                                     | 45.6618 | 12.2272 | freshwater<br>river               | 0.2–0.5 | 0.2  | F ad. | 9.3 | 0.78 | 72 |
|                                                         |            | <i>idem</i>                                                                                   |         |         |                                   |         |      | M ad. | 9.0 | 0.81 | 93 |
|                                                         |            | Italy, Po tributary, Mincio River,<br>upper reservoir, among macrophytes                      | 45.1572 | 10.7720 | <i>idem</i>                       | 0.3–0.5 | 0.1  | F ad. | 8.7 | 0.75 | 54 |
|                                                         |            | Adriatic Sea, Gulf of Trieste,<br>Timavo, immediately below weir                              | 45.7861 | 13.5903 | <i>idem</i>                       | 1–2.5   | 2–13 | M ad. | 5.6 | 0.70 | 53 |
|                                                         |            | Adriatic tributary, Lemene River,<br>river bank at Castello di Brussa,<br><i>Myriophyllum</i> | 45.667  | 12.933  | <i>idem</i>                       | 0.5–1   | 0.2  | M ad. | 6.6 | 0.82 | 92 |
| <i>Diamysis frontieri</i><br>H. Nouvel, 1965            | trogloxene | Red Sea, Gulf of Aqaba, sand and<br>seaweed                                                   | 29.4000 | 34.9668 | marine<br>sublittoral             | 17–25   | 42   | F ad. | 4.3 | 0.33 | 53 |
|                                                         |            |                                                                                               |         |         |                                   |         |      | F ad. | 4.5 | 0.36 | 53 |
|                                                         |            |                                                                                               |         |         |                                   |         |      | F ad. | 5.3 | 0.37 | 44 |
|                                                         |            |                                                                                               |         |         |                                   |         |      | M ad. | 4.4 | 0.39 | 29 |
|                                                         |            |                                                                                               |         |         |                                   |         |      | M ad. | 4.6 | 0.33 | 44 |
| <i>Diamysis hebraica</i><br>Almeida Prado-Por, 1981     | trogloxene | Israel, Nahal Taninim, from<br>filiform green algae                                           | 32.5487 | 34.9136 | oligohaline<br>creek              | 0.1–0.4 | 4    | M ad. | 5.0 | 0.48 | 48 |
| <i>Diamysis lacustris</i><br>Băcescu, 1940              | trogloxene | Montenegro, Lake Scutari, tributary<br>Morača                                                 | 42.260  | 19.143  | mouth of small<br>river into lake |         | <1   | F ad. | 8.0 | 0.60 | 77 |
|                                                         |            |                                                                                               |         |         |                                   |         |      | M ad. | 5.2 | 0.53 | 43 |

|                                                         |            |                                                          |         |          |                       |       |             |        |     |       |    |
|---------------------------------------------------------|------------|----------------------------------------------------------|---------|----------|-----------------------|-------|-------------|--------|-----|-------|----|
| <i>Diamysis lagunaris</i><br>Ariani et Wittmann, 2000   | trogloxene | Tyrrhenian Sea, Lago di Caprolace                        | 41.3617 | 12.9700  | brackish lagoon       | 0.3–1 | 41          | F ad.  | 6.2 | 0.65  | 68 |
|                                                         |            |                                                          |         |          |                       |       |             | F ad.  | 4.6 | 0.63  | 63 |
|                                                         |            |                                                          |         |          |                       |       |             | F ad.  | 6.1 | 0.78  | 72 |
|                                                         |            |                                                          |         |          |                       |       |             | F ad.  | 7.2 | 0.81  | 88 |
|                                                         |            |                                                          |         |          |                       |       |             | M ad.  | 5.5 | 0.60  | 54 |
| <i>Diamysis mesohalobia</i><br>Ariani et Wittmann, 2000 | trogloxene | Adriatic coast, Apulia, Fiume Piccolo                    | 40.8284 | 17.4785  | brackish karst spring | 0.5–1 | 10–14       | F ad.  | 6.3 | 0.56  | 62 |
|                                                         |            |                                                          |         |          |                       |       |             | F ad.  | 6.6 | 0.54  | 62 |
|                                                         |            |                                                          |         |          |                       |       |             | F ad.  | 6.8 | 0.48  | 44 |
|                                                         |            |                                                          |         |          |                       |       |             | M ad.  | 5.6 | 0.48  | 53 |
|                                                         |            |                                                          |         |          |                       |       |             | M ad.  | 6.2 | 0.56  | 55 |
| <i>Diamysis pengoi</i><br>(Czerniavsky, 1882)           | trogloxene | Black Sea coast, Canalul Dunavăț                         | 44.9355 | 29.0967  | small canal           | 0.3–3 | 0.1         | M ad.  | 6.2 | 0.65  | 53 |
| <i>Diamysis pusilla</i><br>(G.O. Sars, 1907)            | trogloxene | Caspian Lake, off promontory Kara-Singir                 | 40.713  | 52.833   | brackish lake         |       |             | F sub. | 4.4 | 0.38  | 30 |
|                                                         |            |                                                          |         |          |                       |       |             | F sub. | 5.0 | 0.51  | 44 |
|                                                         |            |                                                          |         |          |                       |       |             | M ad.  | 4.8 | 0.46  | 45 |
| <i>Gangemysis assimilis</i><br>(W.M. Tattersall, 1908)  | trogloxene | Bangladesh, Khiru River, site Kaoraid                    | 24.3149 | 90.4954  | freshwater river      | 0–1   | <1          | F ad.  | 4.2 | 0.41  | 44 |
|                                                         |            |                                                          |         |          |                       |       |             | F ad.  | 4.4 | 0.47  | 36 |
|                                                         |            |                                                          |         |          |                       |       |             | F ad.  | 4.4 | 0.40  | 36 |
|                                                         |            |                                                          |         |          |                       |       |             | F ad.  | 4.7 | 0.48  | 27 |
|                                                         |            |                                                          |         |          |                       |       |             | M ad.  | 3.9 | 0.40  | 25 |
| <i>Heteromysis bermudensis</i><br>G.O. Sars, 1885       | trogloxene | Bermuda, Tobacco Bay, from <i>Callyspongia vaginalis</i> | 32.3889 | –64.6790 | marine sublittoral    | 3     | euhaline    | F ad.  | 4.7 | 0.40  | 53 |
|                                                         |            | Bermuda, Tobacco Bay, extracted from gravel              | 32.3889 | –64.6790 | <i>idem</i>           | 3     | <i>idem</i> | M ad.  | 4.6 | 0.41  | 62 |
|                                                         |            | Bermuda, Walsingham Pond; algae and rock recesses        | 32.3462 | –64.7090 | mangrove swamp        | 2–3   | 37          | M sub. | 3.1 | 0.28  | 89 |
| <i>Heteromysis dispar</i><br>Brattegard, 1970           | trogloxene | Caribbean, Martinique, Ainse Noir Cave                   | 14.5283 | –61.0883 | marine sublittoral    | 4     | euhaline    | F ad.  | 5.1 | 0.50  | 98 |
|                                                         |            | <i>idem</i>                                              |         |          |                       |       |             | F ad.  | 5.2 | 0.53  | 89 |
|                                                         |            | Caribbean, Guadeloupe. Amedien Cave                      | 14.5325 | –61.0883 | <i>idem</i>           | 6     | <i>idem</i> | F ad.  | 4.8 | 0.56  | 62 |
|                                                         |            | <i>idem</i>                                              |         |          |                       |       |             | F ad.  | 5.1 | 0.53  | 80 |
|                                                         |            | <i>idem</i>                                              |         |          |                       |       |             | M ad.  | 4.8 | 0.42  | 62 |
| <i>Heteromysis microps</i><br>(G.O. Sars, 1877)         | trogloxene | Adriatic, Gulf of Trieste, Strunjan                      | 45.5286 | 13.6066  | coastal lagoon        | 0.5–2 | 37–42       | F ad.  | 7.5 | 0.498 | 98 |
|                                                         |            | <i>idem</i>                                              |         |          |                       |       |             | M ad.  | 4.3 | 0.382 | 71 |
|                                                         |            | Sardinia, Porto Conte, <i>Posidonia</i>                  | 40.5945 | 8.2158   | marine sublittoral    |       | euhaline    | F ad.  | 9.4 | 0.631 | 87 |
|                                                         |            | <i>idem</i>                                              |         |          |                       |       |             | M ad.  | 6.6 | 0.449 | 75 |

|                                                            |            |                                                                                     |         |          |                            |        |                   |       |      |       |     |
|------------------------------------------------------------|------------|-------------------------------------------------------------------------------------|---------|----------|----------------------------|--------|-------------------|-------|------|-------|-----|
|                                                            |            | Malta, White Tower, <i>Posidonia</i>                                                | 35.995  | 14.359   | <i>idem</i>                | 16     | 37                | M ad. | 6.1  | 0.471 | 116 |
| <i>Heteromysis sabelliphila</i><br>Wittmann et Wirtz, 2017 | trogloxene | Cape Verdes, Sao Nicolau, mysids<br>underneath stones                               | 16.5890 | −24.1681 | marine<br>sublittoral      | 4      | euhaline          | F ad. | 7.0  | 0.57  | 44  |
|                                                            |            | Cape Verdes, Santiago Island                                                        | 15.2781 | −23.7606 | sublittoral<br>cave        | 15     | 35                | M ad. | 3.5  | 0.33  | 41  |
| <i>Idiomysis diadema</i><br>Wittmann, 2016                 | trogloxene | Red Sea, Dahab, Moray Garden, no<br>host                                            | 28.4372 | 34.4616  | marine<br>sublittoral      | 12     | <i>idem</i>       | F ad. | 2.3  | 0.28  | 27  |
|                                                            |            | <i>idem</i>                                                                         |         |          |                            |        |                   | M ad. | 1.4  | 0.26  | 71  |
|                                                            |            | <i>idem</i>                                                                         |         |          |                            |        |                   | M ad. | 1.8  | 0.24  | 24  |
|                                                            |            | Red Sea, Dahab, Bannerfish Bay,<br>on <i>Diadema setosum</i>                        | 28.496  | 34.521   | <i>idem</i>                | 1–8    | 38                | F ad. | 3.3  | 0.44  | 44  |
|                                                            |            |                                                                                     |         |          |                            |        |                   | M ad. | 2.2  | 0.31  | 36  |
| <i>Idiomysis tsumamali</i><br>Băcescu, 1973                | trogloxene | Red Sea, Dahab, on <i>Megalactis</i><br><i>hemprichi</i>                            | 28.505  | 34.522   | marine<br>sublittoral      | 10–12  | euhaline          | F ad. | 3.1  | 0.53  | 53  |
|                                                            |            | <i>idem</i>                                                                         |         |          |                            |        |                   | F ad. | 4.1  | 0.48  | 53  |
|                                                            |            | Red Sea, Lagoon of Dahab, on<br><i>Cerianthus</i>                                   | 28.475  | 34.5049  | <i>idem</i>                | 10     | mixo-<br>euhaline | F ad. | 2.8  | 0.39  | 71  |
|                                                            |            |                                                                                     |         |          |                            |        |                   | M ad. | 3.2  | 0.49  | 44  |
|                                                            |            |                                                                                     |         |          |                            |        |                   | M ad. | 2.6  | 0.30  | 53  |
| <i>Indomysis nybini</i><br>Biju et Panampunnayil, 2010     | trogloxene | Arabian Gulf, Bahrain, Tubli Bay,<br>clay                                           | 26.1719 | 50.5886  | marine                     |        | 43–44             | M ad. | 4.0  | 0.50  | 32  |
|                                                            |            | Pakistan, Karachi, Sands Pit,<br>backwater                                          | 24.83   | 66.93    | <i>idem</i>                | < 10 m | 47–45             | M ad. | 5.4  | 0.93  | 68  |
| <i>Ischiomysis peterwirtzi</i><br>Wittmann, 2013           | trogloxene | Cape Verdes, São Vicente, cave<br>Furna da Rosa                                     | 16.8683 | −25.0772 | marine<br>sublittoral cave | 16     | 36                | M ad. | 4.7  | 0.47  | 62  |
|                                                            |            | <i>idem</i>                                                                         |         |          |                            |        |                   | M ad. | 5.8  | 0.58  | 71  |
|                                                            |            | <i>idem</i>                                                                         |         |          |                            |        |                   | M ad. | 5.9  | 0.61  | 53  |
|                                                            |            | Cape Verdes, São Vicente,<br>microcave with <i>Telmatactis cricoides</i>            | 16.8427 | −25.0827 | marine<br>sublittoral      | 8      | 36                | F ad. | 4.8  | 0.65  | 71  |
|                                                            |            |                                                                                     |         |          |                            |        |                   | M ad. | 3.9  | 0.54  | 44  |
| <i>Leptomysis buergii</i><br>Băcescu, 1966                 | trogloxene | Adriatic Sea, Rovinj, Punta Croce,<br>in rock recesses                              | 45.117  | 13.6049  | marine<br>sublittoral      | 3      | 35                | F ad. | 11.9 | 0.83  | 107 |
|                                                            |            |                                                                                     |         |          |                            |        |                   | M ad. | 8.3  | 0.59  | 98  |
|                                                            |            |                                                                                     |         |          |                            |        |                   | M ad. | 9.0  | 0.66  | 89  |
|                                                            |            |                                                                                     |         |          |                            |        |                   | M ad. | 9.6  | 0.72  | 98  |
|                                                            |            |                                                                                     |         |          |                            |        |                   | M ad. | 10.2 | 0.76  | 116 |
| <i>Leptomysis lingvura marioni</i><br>(Gourret, 1888)      | trogloxene | Tyrrhenian Sea, Gulf of Naples,<br>Grotta del Mago, rock recess in<br>cave entrance | 40.7117 | 13.9641  | intertidal<br>marine cave  | 10     | 37                | F ad. | 8.2  | 0.70  | 62  |
|                                                            |            |                                                                                     |         |          |                            |        |                   | F ad. | 5.4  | 0.48  | 49  |
|                                                            |            |                                                                                     |         |          |                            |        |                   | F ad. | 5.8  | 0.42  | 49  |
|                                                            |            |                                                                                     |         |          |                            |        |                   | M ad. | 4.7  | 0.38  | 62  |
|                                                            |            |                                                                                     |         |          |                            |        |                   | M ad. | 4.8  | 0.43  | 44  |

|                                                                   |            |                                                                                         |         |          |                         |         |      |       |      |       |    |
|-------------------------------------------------------------------|------------|-----------------------------------------------------------------------------------------|---------|----------|-------------------------|---------|------|-------|------|-------|----|
| <i>Leptomysis truncata</i><br>(Heller, 1863)                      | trogloxene | Baleares, Menorca Isl., Cala Santandria, small cave                                     | 39.9784 | 3.8381   | marine sublittoral cave | 0.5–2   | 37   | F ad. | 6.0  | 0.50  | 36 |
|                                                                   |            |                                                                                         |         |          |                         |         |      | F ad. | 6.3  | 0.51  | 62 |
|                                                                   |            |                                                                                         |         |          |                         |         |      | F ad. | 7.9  | 0.61  | 53 |
|                                                                   |            |                                                                                         |         |          |                         |         |      | M ad. | 5.7  | 0.50  | 44 |
|                                                                   |            |                                                                                         |         |          |                         |         |      | M ad. | 6.8  | 0.57  | 71 |
| <i>Limnomysis benedeni</i><br>Czerniavsky, 1882                   | trogloxene | Black Sea tributary, Danube Delta, Lake Furtuna, mysids indigenous <i>idem</i>          | 45.2162 | 29.1401  | delta lake              | 3       | 0.1  | M ad. | 9.9  | 0.81  | 72 |
|                                                                   |            |                                                                                         |         |          |                         |         |      | F ad. | 10.7 | 0.87  | 82 |
|                                                                   |            | France, Rhône tributary, Canal Arles à Fos, mysids non-indigenous                       | 43.6725 | 4.6185   | freshwater canal        | 0.2–2   | 0.1  | F ad. | 7.0  | 0.70  | 77 |
|                                                                   |            |                                                                                         |         |          |                         |         |      | F ad. | 8.1  | 0.71  | 48 |
|                                                                   |            |                                                                                         |         |          |                         |         |      | M ad. | 6.7  | 0.60  | 58 |
| <i>Mysidium cubanense</i><br>Băcescu et Ortiz, 1984               | trogloxene | Caribbean, Curaçao, Boca Sint Michiel, Sun Reef, reef slope                             | 12.1392 | –68.9981 | marine reef             | 15–30   | 36   | F ad. | 3.8  | 0.45  | 71 |
|                                                                   |            | Caribbean, Curaçao, reef slope                                                          | 12.1285 | –68.9792 | <i>idem</i>             | 4–12    | 35   | M ad. | 5.0  | 0.56  | 39 |
|                                                                   |            | Caribbean, Lesser Antilles, Bonaire, Bachelor's Beach, on sea floor                     | 12.126  | –68.2877 | marine                  | 3–26    | 35   | M ad. | 4.0  | 0.51  | 44 |
|                                                                   |            |                                                                                         |         |          |                         |         |      |       |      |       |    |
| <i>Mysidium integrum</i><br>W.M. Tattersall, 1951                 | trogloxene | Caribbean, Curaçao, Blue Chamber (The Cove)                                             | 12.2988 | –69.1544 | intertidal marine cave  | 3       | 36   | F ad. | 3.8  | 0.44  | 71 |
|                                                                   |            |                                                                                         |         |          |                         |         |      | F ad. | 4.1  | 0.46  | 62 |
|                                                                   |            |                                                                                         |         |          |                         |         |      | F ad. | 4.3  | 0.44  | 71 |
|                                                                   |            |                                                                                         |         |          |                         |         |      | M ad. | 4.1  | 0.44  | 89 |
|                                                                   |            |                                                                                         |         |          |                         |         |      | M ad. | 4.3  | 0.50  | 71 |
| <i>Mysidium triangulare</i><br>Wittmann in Wittmann & Wirtz, 2019 | trogloxene | Curacao, Sun Reef, reef flat and slope, microcaves                                      | 12.1392 | –68.9981 | marine reef             | 5–30    | 36   | F ad. | 4.3  | 0.46  | 62 |
|                                                                   |            | <i>idem</i>                                                                             |         |          |                         |         |      | F ad. | 4.5  | 0.48  | 71 |
|                                                                   |            | <i>idem</i>                                                                             |         |          |                         |         |      | M ad. | 4.0  | 0.51  | 71 |
|                                                                   |            | <i>idem</i>                                                                             |         |          |                         |         |      | M ad. | 5.1  | 0.49  | 62 |
|                                                                   |            | Caribbean, Curaçao, Blue Chamber (The Cove)                                             | 12.2988 | –69.1544 | intertidal marine cave  | 3       | 36   | M ad. | 3.8  | 0.44  | 49 |
| <i>Mysidopsis gibbosa</i><br>G.O. Sars, 1864                      | trogloxene | Adriatic Sea, Rovinj, Isl. Figarola, rock recesses, <i>Anemonia viridis</i> <i>idem</i> | 45.095  | 13.620   | marine sublittoral      | 1–2     | 35   | F ad. | 3.0  | 0.293 | 80 |
|                                                                   |            |                                                                                         |         |          |                         |         |      | M ad. | 2.7  | 0.287 | 91 |
|                                                                   |            | Adriatic Sea, Rovinj, Isl. Banjole, rock recesses <i>idem</i>                           | 45.074  | 13.6105  | <i>idem</i>             | 6       | 36   | F ad. | 3.1  | 0.284 | 71 |
|                                                                   |            |                                                                                         |         |          |                         |         |      | M ad. | 2.5  | 0.213 | 80 |
|                                                                   |            | Tyrrhenian Sea, Gulf of Naples, Isl. Ischia, Punta Vico, <i>Posidonia oceanica</i>      | 40.7594 | 13.8908  | <i>idem</i>             | 6–10    | 37   | M ad. | 2.7  | 0.267 | 71 |
| <i>Neomysis integer</i><br>(Leach, 1814)                          | trogloxene | Scotland, Argyll, Loch Creran, near Inver                                               | 56.5137 | –5.3728  | brackish stream         | 0.1–0.3 | 0–25 | F ad. | 13.0 | 0.70  | 71 |
|                                                                   |            |                                                                                         |         |          |                         |         |      | F ad. | 15.3 | 0.83  | 80 |

|                                                            |            |                                                                                      |         |          |                         |         |       |        |      |      |     |
|------------------------------------------------------------|------------|--------------------------------------------------------------------------------------|---------|----------|-------------------------|---------|-------|--------|------|------|-----|
|                                                            |            |                                                                                      |         |          |                         |         |       | F ad.  | 16.2 | 0.83 | 98  |
|                                                            |            |                                                                                      |         |          |                         |         |       | M ad.  | 11.1 | 0.87 | 58  |
|                                                            |            |                                                                                      |         |          |                         |         |       | M ad.  | 12.5 | 0.85 | 62  |
| <i>Paramysis sowinskii</i><br>Daneliya, 2002               | trogloxene | Azov Sea, Miuskii Liman                                                              | 47.25   | 38.8     | brackish lagoon         |         |       | F sub. | 8.3  | 0.56 | 100 |
|                                                            |            |                                                                                      |         |          |                         |         |       | F ad.  | 11.0 | 0.79 | 100 |
|                                                            |            |                                                                                      |         |          |                         |         |       | F ad.  | 11.5 | 0.78 | 71  |
|                                                            |            |                                                                                      |         |          |                         |         |       | M ad.  | 7.9  | 0.67 | 71  |
| <i>Parvimysis bahamensis</i><br>Brattegard, 1969           | trogloxene | Bahamas, Eleuthera, Pelican Cay, sand and coral heads                                | 25.2792 | −76.3389 | marine sublittoral      | 7       |       | F ad.  | 2.6  | 0.27 | 20  |
|                                                            |            |                                                                                      |         |          |                         |         |       | M ad.  | 2.1  | 0.28 | 37  |
| <i>Parvimysis brattegardii</i><br>Wittmann, 2020           | trogloxene | Caribbean, Curaçao, Boca Sint Michiel, Sun Reef, reef flat and slope, night          | 12.1392 | −68.9981 | marine sublittoral      | 5–21    | 36    | F ad.  | 2.8  | 0.24 | 15  |
|                                                            |            |                                                                                      |         |          |                         |         |       | M ad.  | 2.2  | 0.26 | 37  |
|                                                            |            |                                                                                      |         |          |                         |         |       | M ad.  | 2.5  | 0.26 | 32  |
| <i>Parvimysis fittkaui</i><br>Wittmann, 2018               | trogloxene | Amazonia, Rio Negro at confluence with Rio Arara                                     | −2.785  | −60.602  | freshwater river        |         | 0     | F ad.  | 3.7  | 0.25 | 27  |
|                                                            |            |                                                                                      |         |          |                         |         |       | M ad.  | 3.3  | 0.29 | 20  |
| <i>Parvimysis laminata</i><br>Wittmann, 2020               | trogloxene | Caribbean, SW-Bequia, The Grenadines, Full Moon Cave                                 | 12.993  | −61.277  | sublittoral marine cave | 13      |       | F ad.  | 3.1  | 0.28 | 27  |
|                                                            |            |                                                                                      |         |          |                         |         |       | F ad.  | 3.1  | 0.24 | 27  |
|                                                            |            |                                                                                      |         |          |                         |         |       | F ad.  | 3.2  | 0.28 | 36  |
|                                                            |            |                                                                                      |         |          |                         |         |       | F ad.  | 3.3  | 0.28 | 27  |
|                                                            |            |                                                                                      |         |          |                         |         |       | M ad.  | 2.5  | 0.28 | 36  |
| <i>Parvimysis nuda</i><br>Wittmann, 2020                   | trogloxene | Bahamas, Eleuthera, Pelican Cay, sand and coral heads                                | 25.2792 | −76.3389 | marine sublittoral      | 7       |       | F ad.  | 2.6  | 0.26 | 17  |
|                                                            |            |                                                                                      |         |          |                         |         |       | M ad.  | 2.5  | 0.31 | 25  |
|                                                            |            |                                                                                      |         |          |                         |         |       | M ad.  | 3.0  | 0.31 | 53  |
| <i>Parvimysis ornata</i><br>Wittmann, 2020                 | trogloxene | Caribbean coast of Panama, Limon Bay, S of Toro Point, outside reef flat, above sand | 9.3594  | −79.9472 | marine                  | 2–6     | 26–31 | F ad.  | 2.3  | 0.24 | 17  |
|                                                            |            |                                                                                      |         |          |                         |         |       | M ad.  | 1.8  | 0.24 | 25  |
| <i>Parvimysis pisciscibus</i><br>Henderson et Bamber, 1983 | trogloxene | Amazonia, Rio Negro at confluence with Rio Arara                                     | −2.785  | −60.602  | freshwater river        |         | 0     | F ad.  | 2.7  | 0.35 | 29  |
|                                                            |            |                                                                                      |         |          |                         |         |       | F ad.  | 3.1  | 0.31 | 32  |
|                                                            |            |                                                                                      |         |          |                         |         |       | M ad.  | 1.9  | 0.33 | 17  |
|                                                            |            |                                                                                      |         |          |                         |         |       | M ad.  | 2.2  | 0.30 | 29  |
| <i>Parvimysis pricei</i><br>Wittmann, 2020                 | trogloxene | Caribbean, Grand Cayman Island, North Sound                                          | 19.3900 | −81.3535 | marine                  | 2–3     |       | F ad.  | 2.2  | 0.24 | 22  |
|                                                            |            |                                                                                      |         |          |                         |         |       | F ad.  | 2.2  | 0.23 | 27  |
| <i>Praunus flexuosus</i><br>(O.F. Müller, 1776)            | trogloxene | Scotland, Firth of Lorn, Dunstaffnage Bay                                            | 56.450  | −5.433   | marine littoral         | 0.1–0.2 | 28–30 | F ad.  | 19.4 | 1.18 | 107 |

|                                                             |            |                                                                                         |         |          |                              |         |             |        |      |      |     |
|-------------------------------------------------------------|------------|-----------------------------------------------------------------------------------------|---------|----------|------------------------------|---------|-------------|--------|------|------|-----|
|                                                             |            |                                                                                         |         |          |                              |         |             | F ad.  | 20.7 | 1.13 | 78  |
|                                                             |            |                                                                                         |         |          |                              |         |             | F ad.  | 20.9 | 1.07 | 133 |
|                                                             |            |                                                                                         |         |          |                              |         |             | M ad.  | 15.3 | 1.23 | 100 |
|                                                             |            |                                                                                         |         |          |                              |         |             | M ad.  | 19.5 | 1.47 | 121 |
| <i>Praunus neglectus</i><br>(G.O. Sars, 1869)               | trogloxene | Gulf of Biscay, Harbor of Roscoff                                                       | 48.7239 | −3.9751  | marine littoral              | 0.2     |             | F ad.  | 12.3 | 1.00 | 100 |
|                                                             |            | <i>idem</i>                                                                             |         |          |                              |         |             | F ad.  | 17.8 | 1.16 | 150 |
|                                                             |            | <i>idem</i>                                                                             |         |          |                              |         |             | M ad.  | 10.5 | 0.83 | 133 |
|                                                             |            | Scotland, Firth of Lorne, Ganavan Bay                                                   | 56.4363 | −5.4754  | marine (sub)littoral         | 5–1     | 32–35       | F ad.  | 18.8 | 1.30 | 111 |
|                                                             |            |                                                                                         |         |          |                              |         |             | F ad.  | 19.8 | 1.33 | 124 |
| <i>Pyroleptomysis rubra</i><br>Wittmann, 1985               | trogloxene | Adriatic Sea, Rovinj, Isl. Banjole, rock recesses                                       | 45.074  | 13.6105  | marine (sub)littoral         | 6       | 36          | F ad.  | 4.9  | 0.44 | 53  |
|                                                             |            |                                                                                         |         |          |                              |         |             | F ad.  | 5.0  | 0.42 | 53  |
|                                                             |            |                                                                                         |         |          |                              |         |             | F ad.  | 5.2  | 0.47 | 35  |
|                                                             |            |                                                                                         |         |          |                              |         |             | M ad.  | 4.4  | 0.52 | 45  |
|                                                             |            |                                                                                         |         |          |                              |         |             | M ad.  | 4.8  | 0.44 | 53  |
| <i>Schistomysis spiritus</i><br>(Norman, 1860)              | trogloxene | Scotland, Firth of Lorne, Ganavan Bay                                                   | 56.436  | −5.4754  | marine (sub)littoral         | 0.7     | 32–35       | F ad.  | 10.9 | 0.98 | 111 |
|                                                             |            |                                                                                         |         |          |                              |         |             | F ad.  | 12.0 | 0.90 | 111 |
|                                                             |            |                                                                                         |         |          |                              |         |             | F ad.  | 12.7 | 1.05 | 94  |
|                                                             |            |                                                                                         |         |          |                              |         |             | M ad.  | 9.3  | 0.92 | 100 |
|                                                             |            |                                                                                         |         |          |                              |         |             | M ad.  | 10.1 | 0.92 | 67  |
| <i>Siriella clausii</i><br>G.O. Sars, 1877                  | trogloxene | Baleares, Menorca Isl., Cala Santandria, small cave                                     | 39.9784 | 3.8381   | (sub)littoral<br>marine cave | 0.5–1   | 37          | M ad.  | 4.9  | 0.44 | 27  |
|                                                             |            | <i>idem</i>                                                                             |         |          |                              |         |             | M ad.  | 5.5  | 0.47 | 36  |
|                                                             |            | <i>idem</i>                                                                             |         |          |                              |         |             | M ad.  | 6.0  | 0.50 | 27  |
|                                                             |            | Adriatic Sea, Isl. Hvar, Marinkovac, U. Zdrilica                                        | 43.160  | 16.419   | <i>idem</i>                  | 0.2–1   | 36          | M ad.  | 7.1  | 0.56 | 53  |
|                                                             |            |                                                                                         |         |          |                              |         |             | M ad.  | 7.7  | 0.64 | 53  |
| <i>Siriella crassipes</i><br>G.O. Sars, 1877                | trogloxene | Azores, Faial, Monte da Guia, underneath stones                                         | 38.5167 | −28.6167 | marine sublittoral           | 12      | 36          | M sub. | 7.5  | 0.57 | 36  |
|                                                             |            | <i>idem</i>                                                                             |         |          |                              |         |             | M ad.  | 8.2  | 0.58 | 53  |
|                                                             |            | Azores, Faial, Monte da Guia, on <i>Aglaophenia tubulifera</i>                          | 38.5167 | −28.6167 | <i>idem</i>                  | 35      | 35          | F ad.  | 8.3  | 0.67 | 53  |
|                                                             |            | <i>idem</i>                                                                             |         |          |                              |         |             | F ad.  | 8.3  | 0.67 | 62  |
|                                                             |            | Azores, Faial, Monte da Guia, in tide pool                                              | 38.5167 | −28.6167 | marine littoral              | 0.1–0.5 |             | M ad.  | 10.3 | 0.72 | 89  |
| <i>Surinamysis robertsonae</i><br>Bamber et Henderson, 1990 | trogloxene | Amazonia, Solimões section of Amazon River, Arara Lake, stand of <i>Paspalum repens</i> | −3.4445 | −61.3449 | freshwater lake              |         | <1          | F ad.  | 5.2  | 0.47 | 58  |
|                                                             |            |                                                                                         |         |          |                              |         |             | M ad.  | 4.8  | 0.44 | 63  |
| <i>Taphromysis bowmani</i><br>Băcescu, 1961                 | trogloxene | Florida, Walkulla Springs                                                               | 30.236  | −84.302  | oligohaline spring           | 12      | oligohaline | F ad.  | 8.7  | 0.68 | 80  |

|                                               |             |                                                                      |           |           |                               |         |         |        |      |       |     |
|-----------------------------------------------|-------------|----------------------------------------------------------------------|-----------|-----------|-------------------------------|---------|---------|--------|------|-------|-----|
|                                               |             |                                                                      |           |           |                               |         |         | F ad.  | 8.9  | 0.68  | 89  |
|                                               |             |                                                                      |           |           |                               |         |         | F ad.  | 9.1  | 0.71  | 89  |
|                                               |             |                                                                      |           |           |                               |         |         | M ad.  | 6.3  | 0.62  | 80  |
|                                               |             |                                                                      |           |           |                               |         |         | M ad.  | 6.4  | 0.62  | 86  |
| <i>Taphromysis lousianae</i><br>Banner, 1953  | trogloxene  | Florida, laboratory culture, original<br>stock from Blackwater River | 30.634    | −87.018   | oligohaline<br>riverine reach | 0–2     | 1       | F ad.  | 8.1  | 0.76  | 78  |
|                                               |             |                                                                      |           |           |                               |         |         | F ad.  | 9.1  | 0.71  | 89  |
|                                               |             |                                                                      |           |           |                               |         |         | M ad.  | 6.7  | 0.71  | 98  |
|                                               |             |                                                                      |           |           |                               |         |         | M ad.  | 7.2  | 0.71  | 62  |
|                                               |             |                                                                      |           |           |                               |         |         | M ad.  | 8.7  | 0.62  | 89  |
| Order STYGIOMYSIDA                            |             |                                                                      |           |           |                               |         |         |        |      |       |     |
| <i>Stygiomysis major</i><br>Bowman, 1976      | troglobiont | Jamaica, Portland Ridge in Parish<br>Clarendon, Jackson's Bay Cave   | 17.74     | −77.215   | anchihaline<br>cave           | surface | 4       | F sub. | 15.7 | 0.311 | 89  |
| <i>Spelaeomysis bottazzii</i><br>Caroli, 1924 | troglobiont | S-Italy, Apulia, Torre Canne,<br>Difesa di Malta                     | 40.806808 | 17.519239 | brackish well                 | 0–0.3   | 2.3–7.1 | F ad.  | 8.5  | 0.356 | 80  |
|                                               |             |                                                                      |           |           |                               |         |         | F ad.  | 8.5  | 0.317 | 62  |
|                                               |             |                                                                      |           |           |                               |         |         | F ad.  | 9.3  | 0.373 | 86  |
|                                               |             |                                                                      |           |           |                               |         |         | F ad.  | 9.8  | 0.483 | 116 |
|                                               |             |                                                                      |           |           |                               |         |         | F ad.  | 9.8  | 0.356 | 89  |
|                                               |             |                                                                      |           |           |                               |         |         | F ad.  | 10.6 | 0.587 | 98  |
|                                               |             |                                                                      |           |           |                               |         |         | F ad.  | 10.9 | 0.533 | 116 |
|                                               |             |                                                                      |           |           |                               |         |         | F ad.  | 11.0 | 0.411 | 71  |
|                                               |             |                                                                      |           |           |                               |         |         | F ad.  | 11.3 | 0.382 | 98  |
|                                               |             |                                                                      |           |           |                               |         |         | M ad.  | 8.7  | 0.444 | 71  |
|                                               |             |                                                                      |           |           |                               |         |         | M ad.  | 8.7  | 0.334 | 53  |
|                                               |             |                                                                      |           |           |                               |         |         | M ad.  | 8.8  | 0.400 | 76  |
|                                               |             |                                                                      |           |           |                               |         |         | M ad.  | 8.8  | 0.373 | 62  |
|                                               |             |                                                                      |           |           |                               |         |         | M ad.  | 8.9  | 0.356 | 89  |
|                                               |             |                                                                      |           |           |                               |         |         | M ad.  | 9.1  | 0.391 | 80  |
|                                               |             |                                                                      |           |           |                               |         |         | M ad.  | 9.2  | 0.281 | 76  |
|                                               |             |                                                                      |           |           |                               |         |         | M ad.  | 9.2  | 0.418 | 80  |
|                                               |             |                                                                      |           |           |                               |         |         | M ad.  | 9.2  | 0.391 | 71  |
|                                               |             |                                                                      |           |           |                               |         |         | M ad.  | 9.5  | 0.516 | 89  |
|                                               |             |                                                                      |           |           |                               |         |         | M ad.  | 10.1 | 0.418 | 89  |
|                                               |             |                                                                      |           |           |                               |         |         | M ad.  | 10.8 | 0.411 | 80  |
|                                               |             |                                                                      |           |           |                               |         |         | M ad.  | 10.9 | 0.356 | 93  |
|                                               |             |                                                                      |           |           |                               |         |         | M ad.  | 11.2 | 0.471 | 71  |
